# Supplementary material
Source: publisher figshare collection journal article supplement (https://karger.figshare.com/articles/dataset/_/5241193)

## Erratum

In the article by Fontanesi et al.,  
'Copy Number Variation and Missense Mutations of the Agouti Signaling Protein (*ASIP*)  
Gene in Goat Breeds with Different Coat Colors'  
(Cytogenet Genome Res 2009;126:333–347)

an old version of figure 5 has been published.  
Below the correct figure 5 is shown.

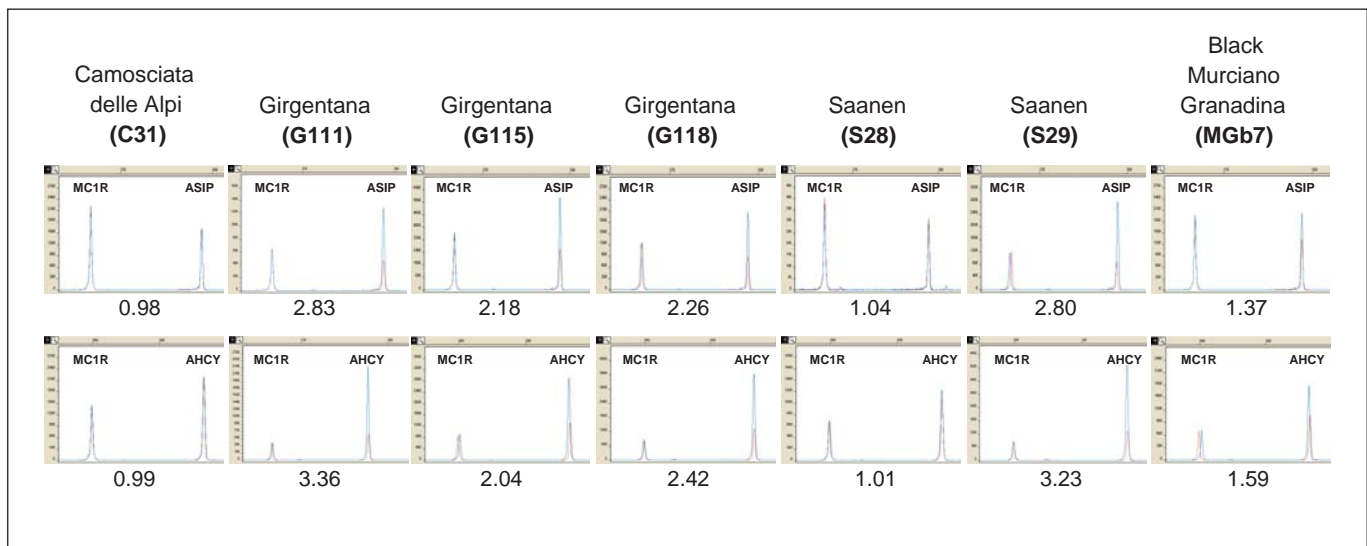

Supplement: Supplementary file 1 [file 1]
