# Supplementary material
Source: publisher figshare collection journal article supplement (https://karger.figshare.com/articles/dataset/_/5241193)
Supplement: Supplementary file 2 [file 1]

## Supplemental Methods

### Data analysis. Description of the procedure for sequence electropherogram correction for unequal genotyping efficiency and normalization:

The sequencing method needs a correction for unequal genotyping efficiency for the different alleles and this can be obtained comparing the peak height of the polymorphic base between known heterozygous individuals and the other DNA samples. However, in CNV it is not possible to be certain that heterozygous animals contain the 1:1 ratio for the two alleles, thus we used as reference samples i) two heterozygous samples for the g.180T>G mutation with similar electropherogram peak heights for the two polymorphic bases (T and G), pre-selected according to the RI value of the PCR-RFLP bands, and ii) two artificial heterozygous samples obtained mixing the same DNA amount, estimated using a NanoDrop ND-1000 spectrophotometer (NanoDrop Technologies Inc., Wilmington, DE, USA), of two different homozygous g.180TT and two different homozygous g.180GG animals. As reference samples for the g.187T>G SNP, two heterozygous animals that showed RI close to 0.30 were selected (a value close to the RI obtained for the reference samples constructed for the g.180T>G mutation). Sequencing peaks need also normalization before any ratio can be determined, as peak heights of different bases are not uniform in the electropherograms. The normalizing factor can be calculated for a polymorphic base, for example “T”, by taking the peak height of all “Ts” (or practically 10-20 “Ts”) before and after the polymorphic “T”. Thus, to normalize and estimate the copy ratio for the desired peak allele ( $p$ ) in an unknown sample between the reference samples, the following formula was used:

$$p = (B_{\text{ref}}/B_{\text{unknown}}) \times (b_{\text{unknown}}/b_{\text{ref}}) \times 0.5,$$

where

$p$  is the ratio for Allele 1, the allele with the base with the highest peak in the SNP position,

$q = 1 - p$  is the ratio of Allele 2,

$B_{\text{ref}}$  is the average of all considered peak heights of the same base as Allele 1 in the considered reference sample(s) (except for the polymorphic base itself),

$B_{\text{unknown}}$  is the average of all considered peak heights of the same base as Allele 1 in the unknown sample (except for the polymorphic base itself),

$b_{\text{unknown}}$  is the peak height of Allele 1 of the polymorphic base in the unknown sample,

$b_{\text{ref}}$  is the peak height of Allele 1 of the polymorphic base in the considered reference sample(s).

As no substantial difference in peak heights was evident between the two reference artificial heterozygous samples and the two reference selected heterozygous samples for the g.180T>G mutation, information of peak height from these four reference samples were averaged.

Differences of peak intensity were also detected for the intronic SNP, but as it was close to the forward primer of the Exon\_4a amplified fragment it was not possible to obtain a reliable evaluation of the rate of this polymorphic site using the electropherogram patterns.

### Supplemental Fig. 1. Sequence and primer pairs of the goat *ASIP* gene.

Sequence of the amplified region of the goat *ASIP* gene obtained with primer pair Exon\_4a (included in EMBL ID: AM746057, without external primer sequences that have been designed on the bovine sequence) encompassing part of intron 3, the coding sequence of exon 4 (177 bp) and the complete 3'-untranslated region. The primer pair regions are indicated with different colours (Exon\_4a, Exon\_4b, Exon\_4c, and Exon\_4d). The forward primer of primer pair Exon\_4b is the same of primer pair Exon\_4a. The coding region is underlined. The stop codon is in bold. The five SNP positions are indicated in red.

Exon\_4a Exon\_4d

T

GAGTGGGGAGGACGTAGATGGCTC**G**GGCAGCCTCGGCGTTTCCCCACAGAGAAAGGCTCCGATGAAGAACGTGG

Exon\_4c G

CACGGACCCGGCCCCCGCCGCCTACCCCTGCGTGG**C**CACCCGCACAGCTGCAAGCCACCAGCGCCCGCCTGC

Exon\_4b T G G

TGCGACCCGTG**C**GCCTTCTGCCAGTGCCGCTTCTTCCGCAGCGCCTGCTCC**T**GCCGCG**T**GC**TCAACCCACCTG**

**CTGAG**CGCGCCTCAGGGTGGTGGGGCGGGGCTCTGGGGACCCCTGGGGCCTTTCTGCCGCGGGAGAGCTCTGGTA

GGAGGGGCTTCCGAGAACGGAGTGGGCGC**GGCTATTGACGTTGGGGC**GGGGCTTCAGGAAGTCTCATCTAGGGT

TGGGCTAAAATCAAATACATATAGTCTTCTCGAAAATGTGTGGTTGTTTCTTTAAGAAACCCGAACCATT**CTT**

**TTCCCTTCGCCTAGTCC**

**Supplemental Table 1. PCR primers, PCR conditions, and use of the amplified products.**

| Genes/Primer pair                | Forward and <i>reverse</i> primers (5'-3')          | Amplified regions                                                                                            | Fragment length (bp) | PCR conditions <sup>a</sup> | Use                                                                                                                     |
|----------------------------------|-----------------------------------------------------|--------------------------------------------------------------------------------------------------------------|----------------------|-----------------------------|-------------------------------------------------------------------------------------------------------------------------|
| <i>ASIP</i> Exon_2               | ggtcagagtaccagcccaaa<br><i>gtatcggcttggggagtgtt</i> | Part of intron 1, exon 2, and part of intron 2                                                               | 352                  | 58/1.5/TG                   | Sequencing                                                                                                              |
| <i>ASIP</i> Exon_3               | aacctggggcttcctaga<br><i>caggacggtttggtagctt</i>    | Part of intron 2, exon 3, and part of intron 3                                                               | 299                  | 56/2.0/TG                   | Sequencing; SQM-PCR                                                                                                     |
| <i>ASIP</i> Exon_4a              | gagtggggaggacgtagatg<br><i>ggactaggcgaagggaag</i>   | Part of intron 3, the coding region of exon 4, the 3'-untranslated region and part of the 3'-flanking region | 461                  | 62/2.0/TG                   | Sequencing; PCR-RFLP analysis with <i>Hae</i> III (g.91C>G; and g.180T>G) or <i>Sac</i> II or <i>Cfr</i> 42I (g.187T>G) |
| <i>ASIP</i> Exon_4b <sup>b</sup> | gagtggggaggacgtagatg<br><i>aagcggcactggcagaag</i>   | Part of intron 3 and part of the coding region of exon 4                                                     | 180                  | 63/2.0/PT                   | PCR-RFLP analysis with <i>Hae</i> III (g.91C>G)                                                                         |
| <i>ASIP</i> Exon_4c              | gacagctgcaagccacca<br><i>ctcagcaggtgggttga</i>      | Part of the coding region of exon 4                                                                          | 109                  | 64/2.0/PT                   | PCR-RFLP analysis with <i>Hae</i> III (g.180T>G) or <i>Sac</i> II or <i>Cfr</i> 42I (g.187T>G)                          |
| <i>ASIP</i> Exon_4d              | acagagaaaggtccgatga<br><i>gcccacacgtcaatagcc</i>    | Part of intron 3, the coding region of exon 4 and part of the 3'-untranslated region                         | 298                  | 64/2.0/PT                   | Sequencing; SQM-PCR                                                                                                     |
| <i>MC1R</i> <sup>c</sup>         | ctcgttggcctcttcatagc<br><i>gaagtcttgaagatgcagcc</i> | Part of exon 1 (GenBank: FM212940, <i>Capra hircus</i> )                                                     | 267                  | 59/2.0/PT                   | SQM-PCR                                                                                                                 |
| <i>DGATI</i>                     | ccagtacctggtgagcatcc<br><i>atgagtacagccacacagc</i>  | Part of intron 15, exon 16, intron 16 and part of exon 17 (GenBank: DQ380250, <i>Capra hircus</i> )          | 215                  | 59/2.0/PT                   | SQM-PCR                                                                                                                 |
| <i>AHCY</i>                      | gcctggatggtaaagtgcata<br><i>tctctccccaagagcaaat</i> | Part of the 3'-untranslated region (GenBank: EU185100, <i>Ovis aries</i> )                                   | 294                  | 59/2.0/PT                   | SQM-PCR                                                                                                                 |

<sup>a</sup> PCR conditions: annealing temperature (°C)/[MgCl<sub>2</sub>] mM/thermal cycler: PT = PT-100 (MJ Research, Watertown, MA, USA); TG = T-Gradient (Biometra, Göttingen, Germany).

<sup>b</sup> Primer forward of the *ASIP* Exon\_4b primer pair is the same of *ASIP* Exon\_4a primer pair.

<sup>c</sup> Primers already reported by Fontanesi et al. (2009).

**Supplemental Table 2. Squared Mahalanobis distances between class means obtained clustering the RI values of the PCR-RFLP patterns in the Girgentana breed.**

Squared Mahalanobis distances between class means (above diagonal) and probabilities for F statistics from squared distances (below diagonal) obtained clustering, as described in Material and Methods, the RI values of the PCR-RFLP bands of the g.180T>G and g.187T>G polymorphisms.

|           | Cluster 1 | Cluster 2 | Cluster 3 | Cluster 4 |
|-----------|-----------|-----------|-----------|-----------|
| Cluster 1 | 1         | 24.10     | 173.25    | 193.99    |
| Cluster 2 | <.0001    | 1         | 79.31     | 82.86     |
| Cluster 3 | <.0001    | <.0001    | 1         | 13.89     |
| Cluster 4 | <.0001    | <.0001    | <.0001    | 1         |
